# Supplementary material for: A novel iron(iii)-based heterogeneous catalyst for aqueous oxidation of alcohols using molecular oxygen
Source: Royal Society of Chemistry journal article supplement (doi:10.1039/c5ra16734e), 2015-01-01

## A novel iron(III)-based heterogeneous catalyst for aqueous oxidation of alcohols using molecular oxygen

Debojeet Sahu<sup>a</sup>, Ana Rosa Silva<sup>b</sup> and Pankaj Das<sup>a\*</sup>

<sup>a</sup>Department of Chemistry, Dibrugarh University, Dibrugarh-786004, Assam, India

<sup>b</sup>CICECO-Aveiro Institute of Materials, University of Aveiro, Portugal

**Table S1.** Textural data of the silica-based materials determined by BET method.

| Materials                                 | Surface area<br>(m <sup>2</sup> /g) | Pore volume<br>(cm <sup>3</sup> /g) | Pore diameter<br>(nm) |
|-------------------------------------------|-------------------------------------|-------------------------------------|-----------------------|
| APTES@SiO <sub>2</sub>                    | 416                                 | 0.65                                | 6.33                  |
| Imine@SiO <sub>2</sub>                    | 350                                 | 0.60                                | 6.20                  |
| FeCl <sub>3</sub> -imine@SiO <sub>2</sub> | 283                                 | 0.43                                | 6.09                  |

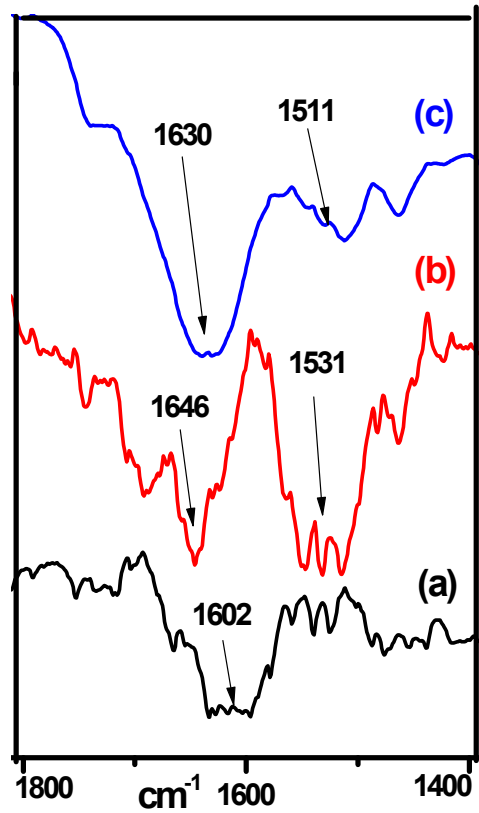

**Fig. S1:** FT-IR spectra of (a) APTES@SiO<sub>2</sub>, (b) imine@SiO<sub>2</sub> and (c) FeCl<sub>3</sub>-imine@SiO<sub>2</sub>.

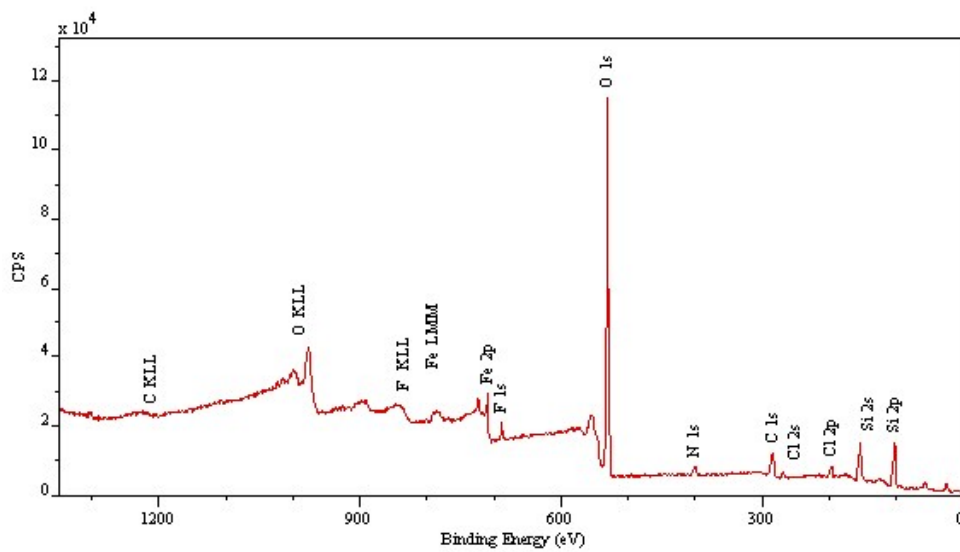

**Fig. S2.** XPS survey spectrum for FeCl<sub>3</sub>-imine@SiO<sub>2</sub>

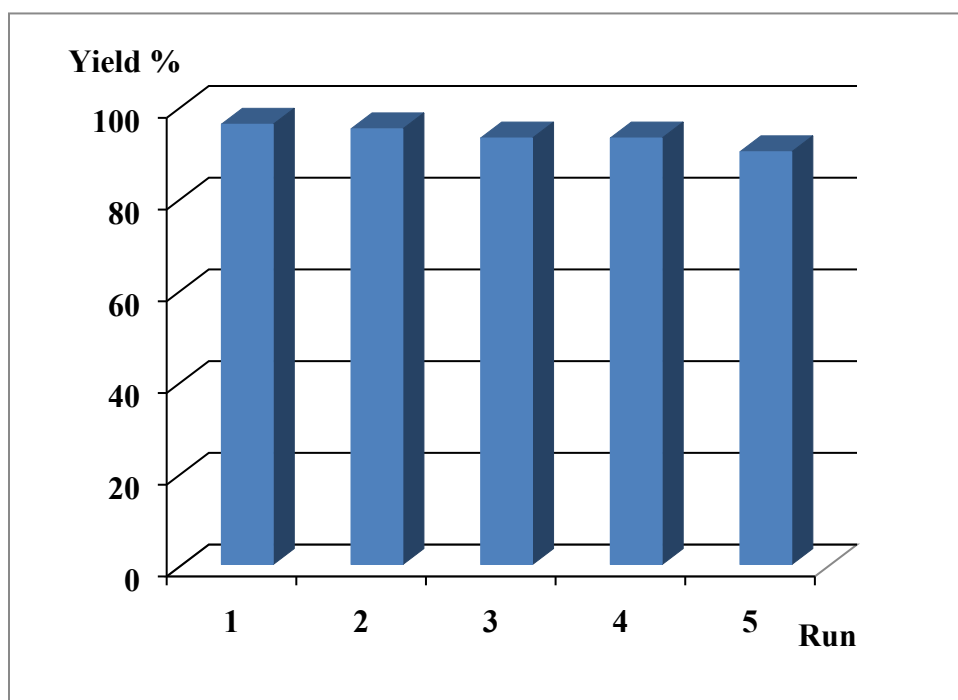

**Fig. S3.** Bar diagram showing the recyclability of benzyl alcohol oxidation using  $\text{FeCl}_3$ -imine@ $\text{SiO}_2$ .

## MS spectra of the products determined by GC-MS

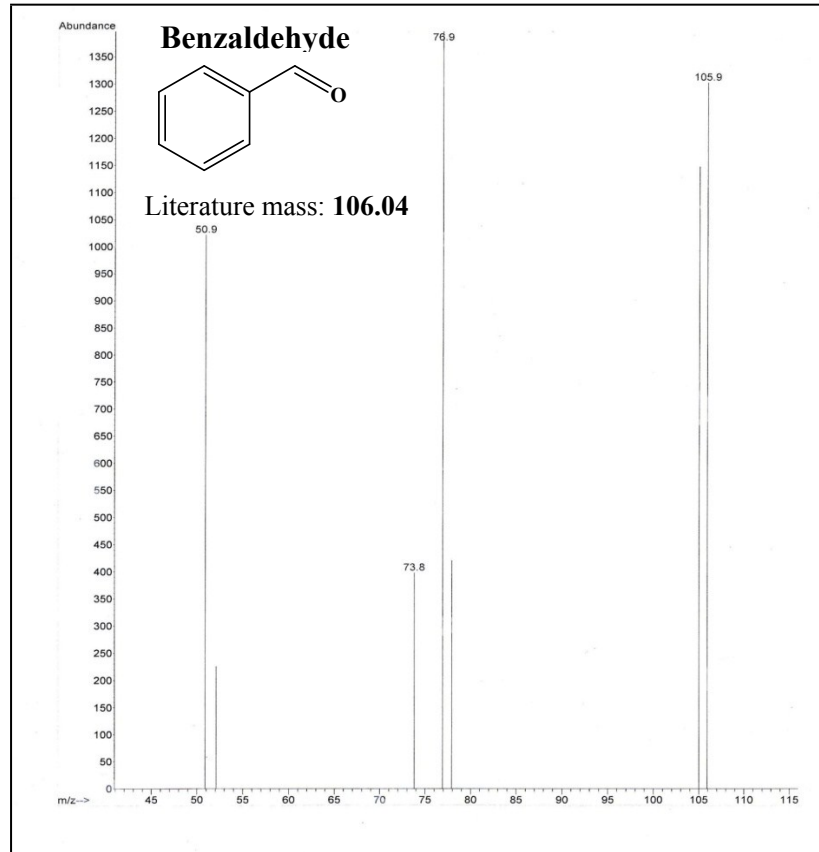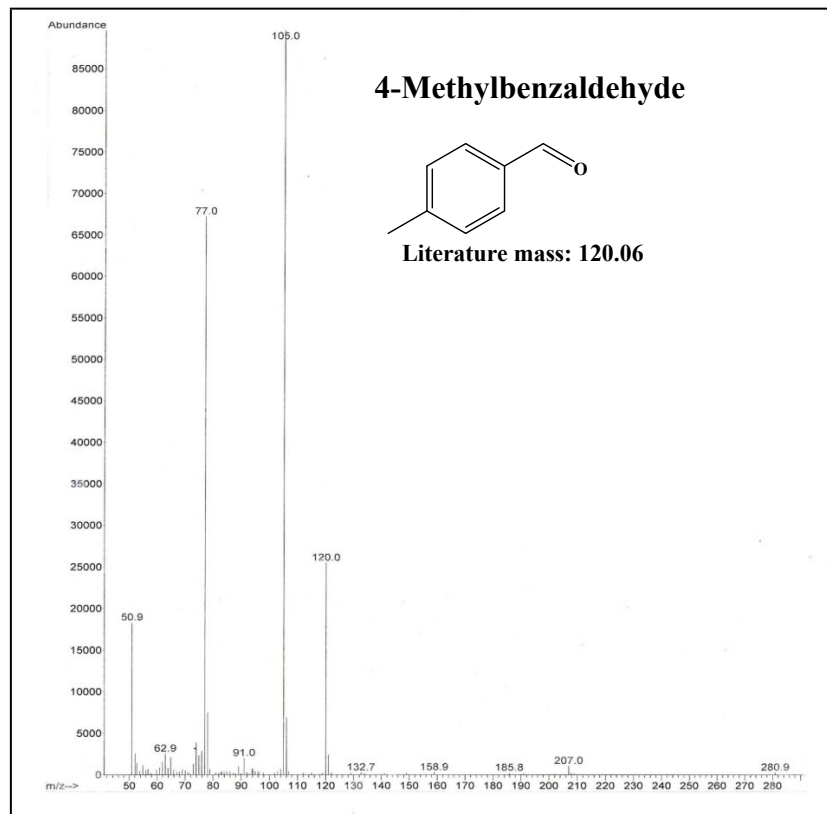

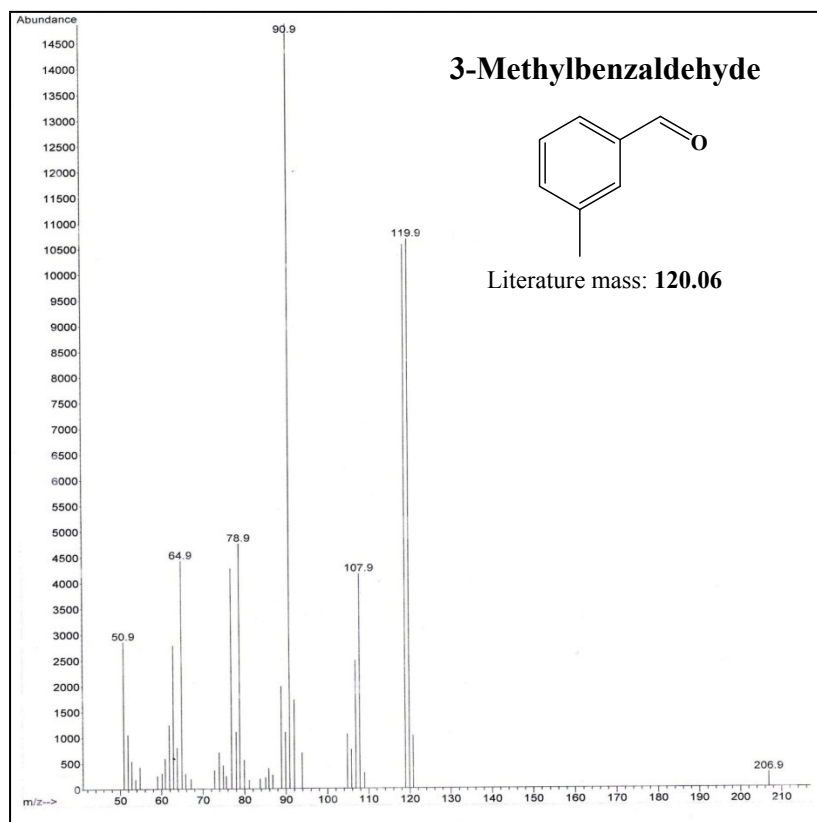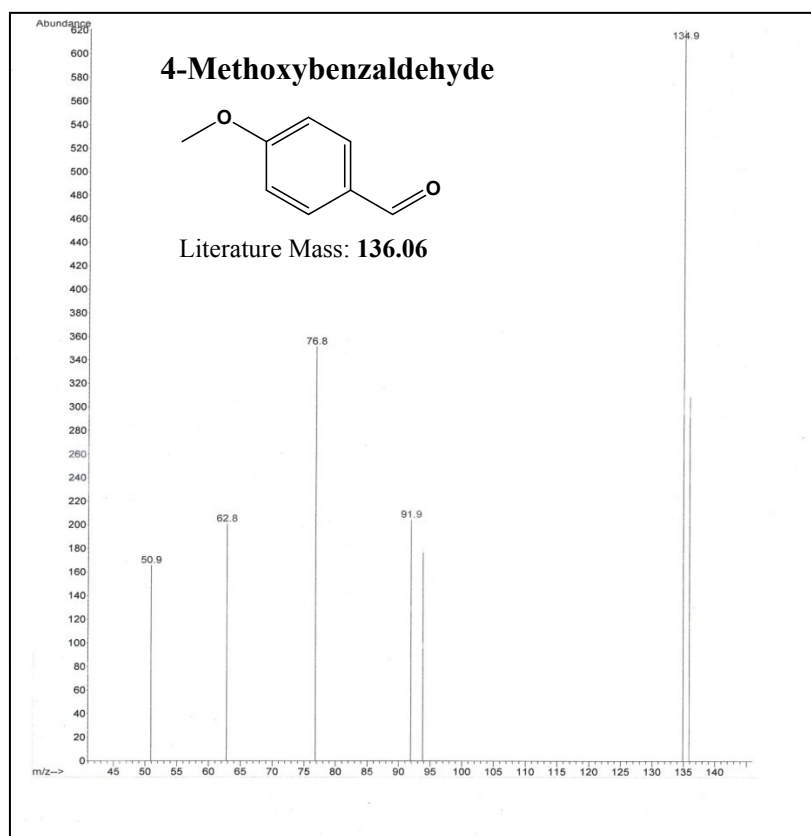

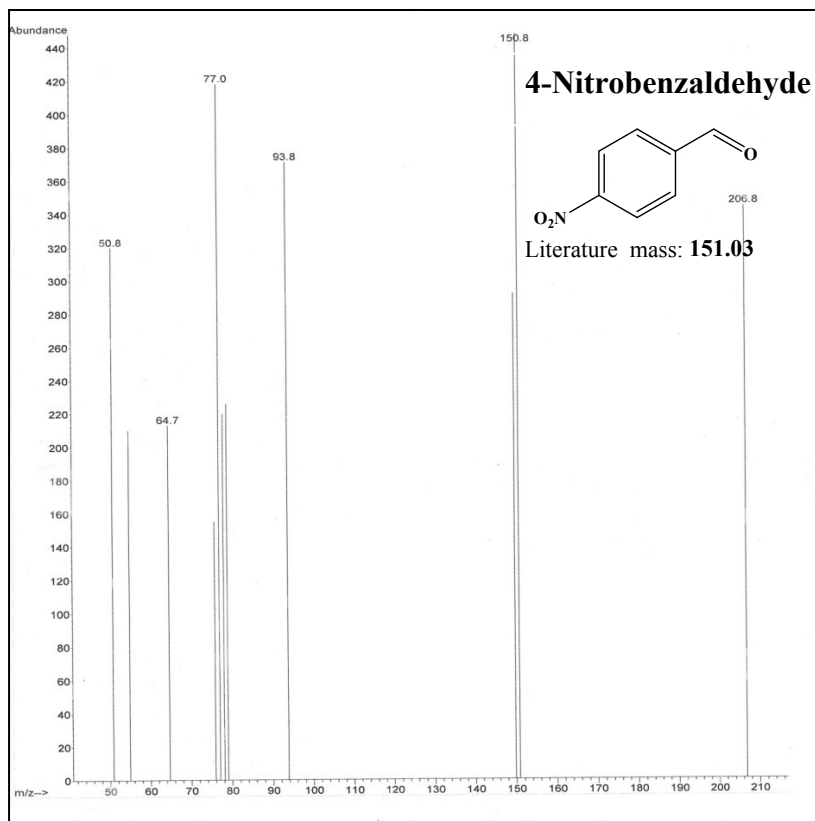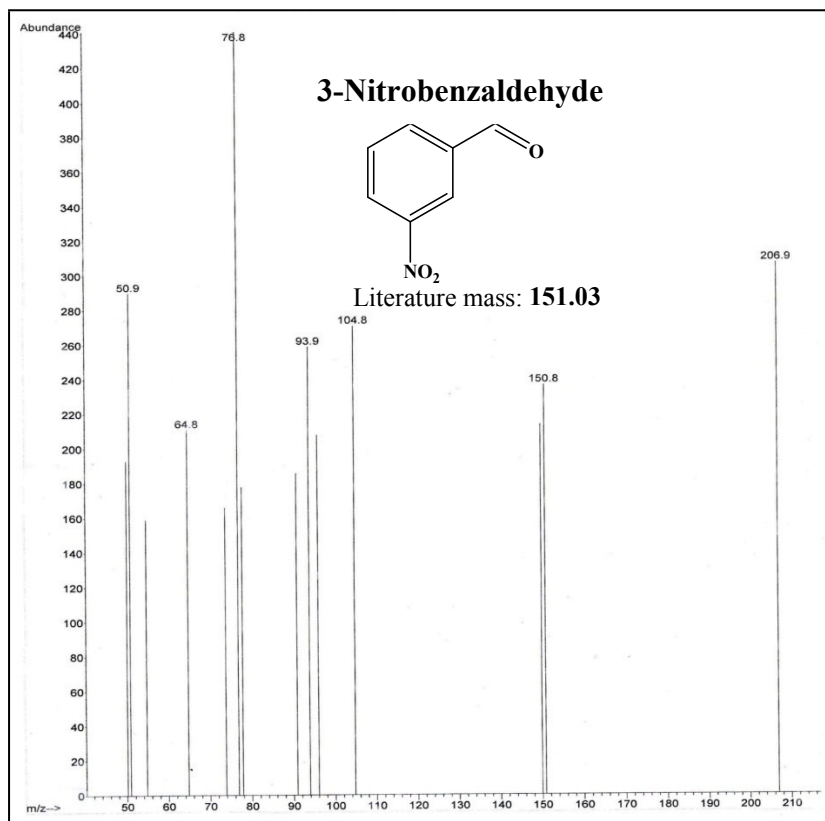

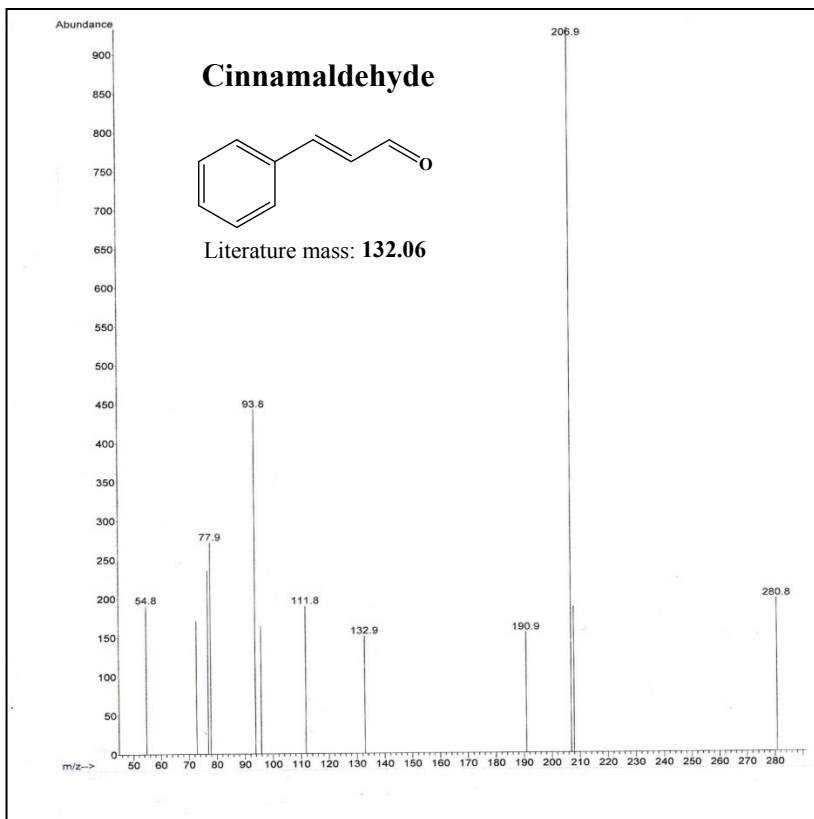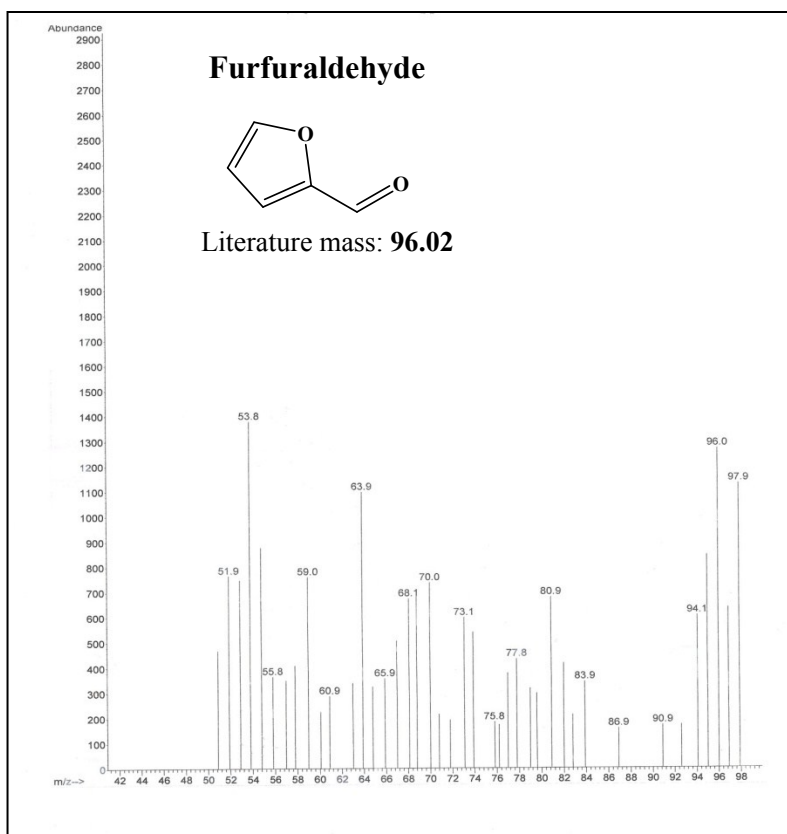

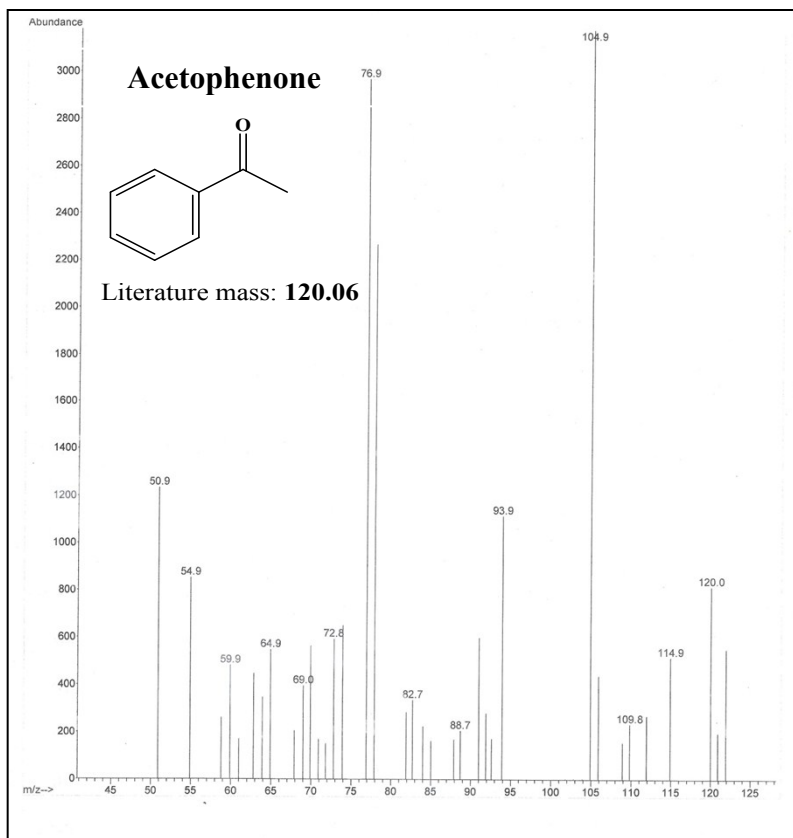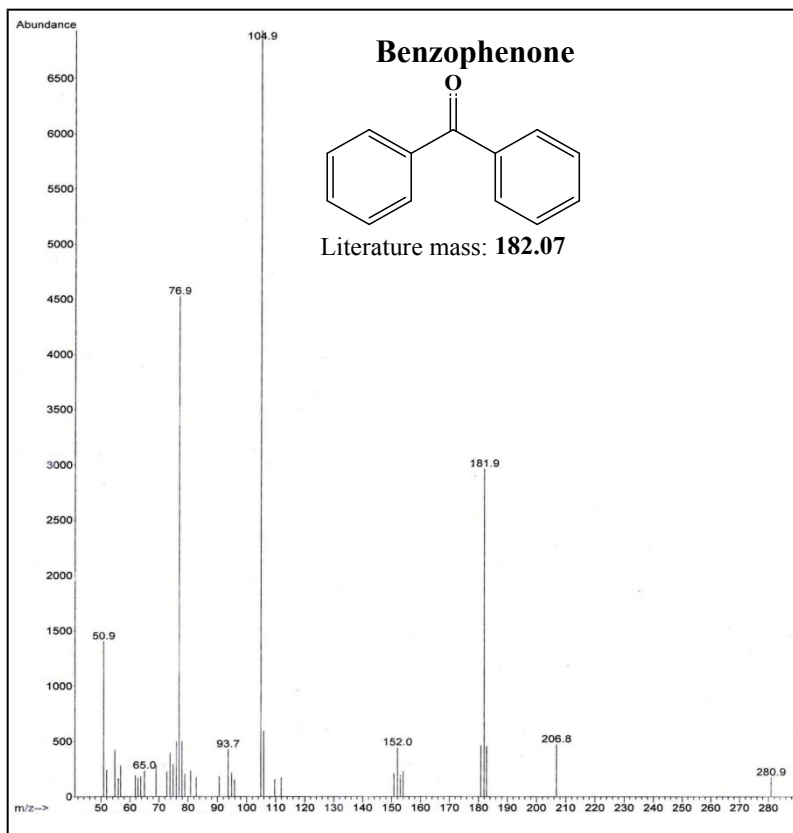



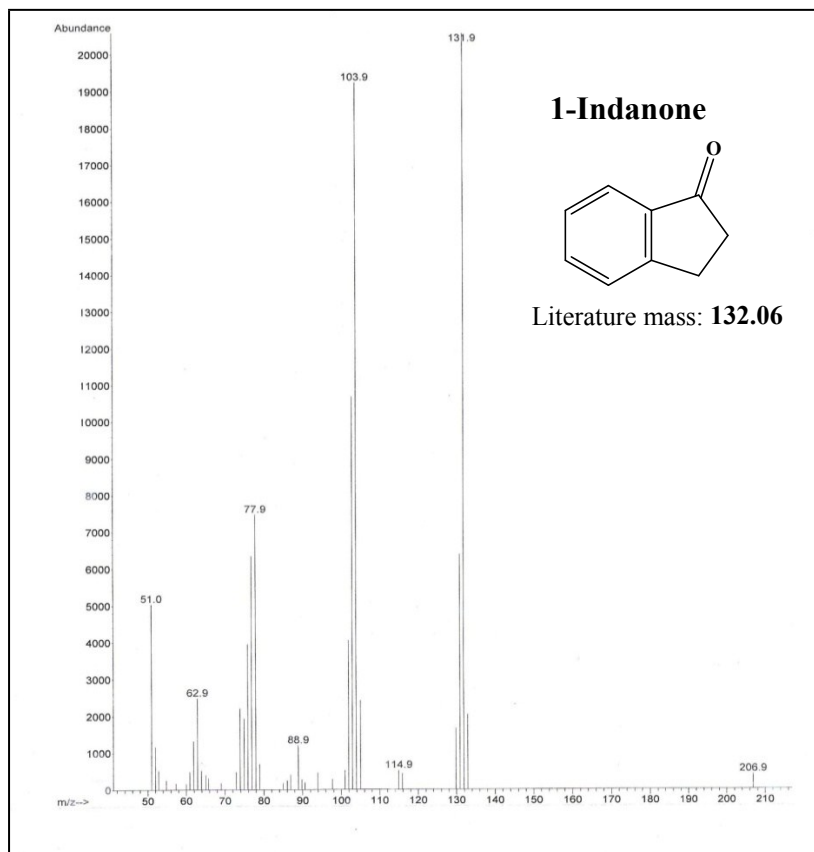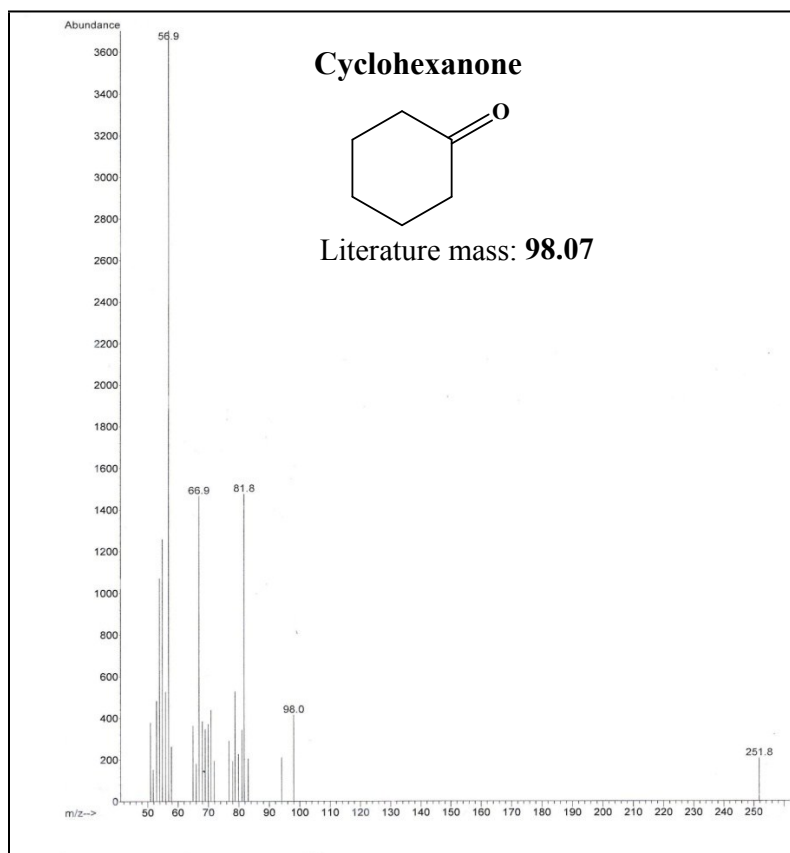

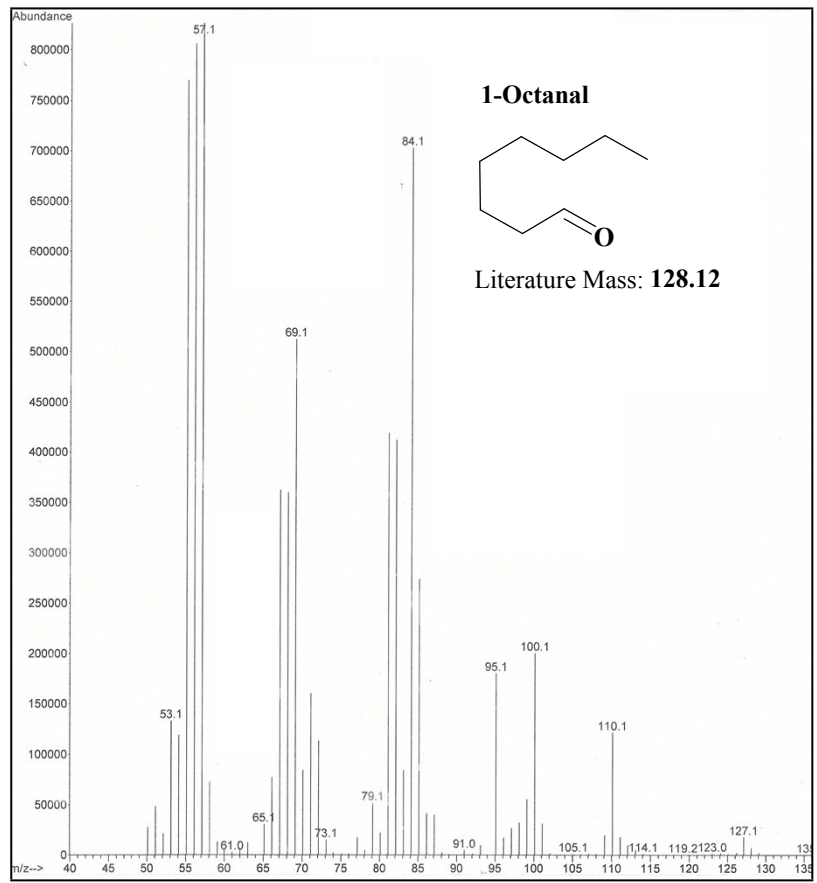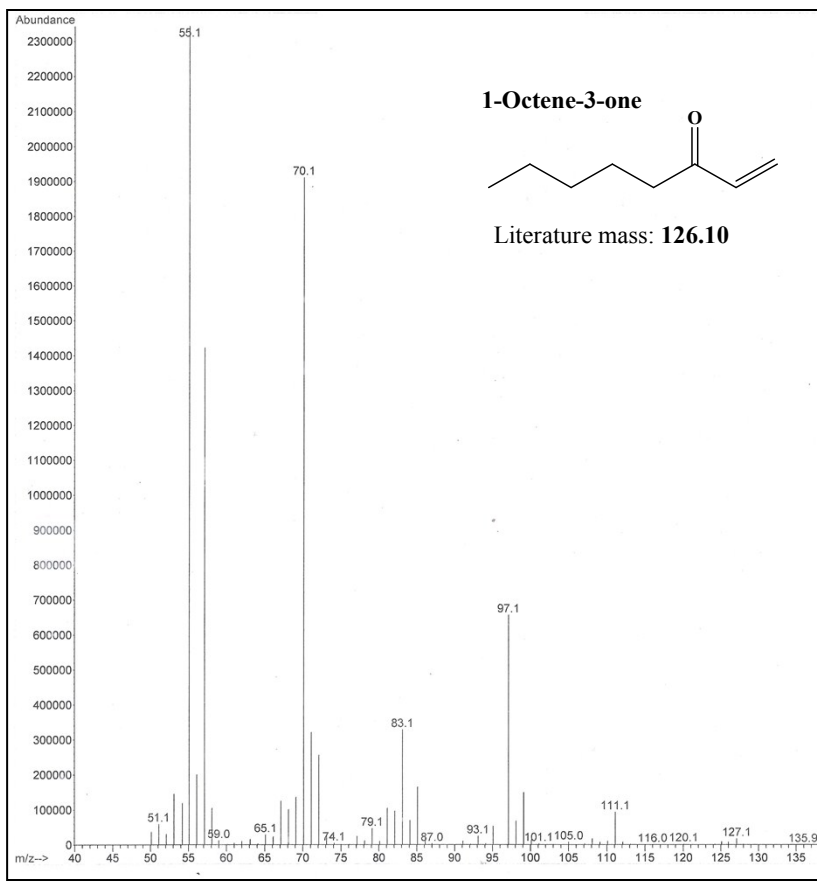

Supplement: c5ra16734e1.pdf [file c5ra16734e1.pdf]
